# Supplementary material for: Barasertib (AZD1152), a Small Molecule Aurora B Inhibitor, Inhibits the Growth of SCLC Cell Lines In Vitro and In Vivo
Source: Oxford University Press journal article supplement (doi:10.1158/1535-7163.mct-16-0298), 2016-08-05
Supplement: 15357163mct160298-sup-166266_1_supp_3586439_ppd9hf.docx [file 15357163mct160298-sup-166266_1_supp_3586439_ppd9hf.docx]

**Supplemental Figure 1**. *Aurora A* (A) and *Aurora B* (B) kinase gene expression in SCLC cell lines. Normal epithelial airway samples were obtained from GSE24337. Raw CEL files from normal and SCLC lines from the Cancer Cell Line Encyclopedia (CCLE) (GSE36133) were normalized by robust multiarray averaging using Affymetrix power tools. All of our 23 SCLC lines are contained in the database. Multiple probe sets for AURKA and AURKB were collapsed by selecting the maximum values using the GSEA collapsed function. Relative *AURKA* and *AURKB* gene expression was generated using R statistical software. *AURKA* and *AURKB* gene expression was significantly higher in SCLC lines than normal epithelial airway cells (p < 0.0001, ANNOVA test). Aurora B protein expression (C). Cell lysates from the indicated SCLC lines were immunoblotted for AURKB with actin as a loading control.
